# Supplementary material for: Changes in Corporate Social Responsibility Efficiency in Chinese Food Industry Brought by COVID-19 Pandemic—A Study With the Super-Efficiency DEA-Malmquist-Tobit Model
Source: Front Public Health. 2022 May 9;10:875030. doi: 10.3389/fpubh.2022.875030 (PMC9124838; doi:10.3389/fpubh.2022.875030)
Supplement: Supplementary file 1 [file Table_1.XLSX]

## Sheet: dea-malmquist
DMU	Year	Return on Net Assets	Tobin Q	Shareholder	Employees	Creditors	Consumers	Government
1	2011	0.252557	3.92409	0.53	70993.5	0.472834	1.17089	0.114696
1	2012	0.284964	4.02506	0.55	78267.8	0.468368	1.12178	0.146096
1	2013	0.36933	5.67845	0.83	89470.8	0.387966	1.1923	0.186188
1	2014	0.378492	6.23671	0.88	93899.8	0.689954	1.04898	0.190101
1	2015	0.308181	5.30025	0.62	100545	1.058	1.19511	0.158376
1	2016	0.245818	3.88684	0.46	104236	0.794328	1.21684	0.136054
1	2017	0.207013	3.56877	0.42	121949	0.203702	1.02601	0.112588
1	2018	0.206851	3.07883	0.42	169815	0.625097	1.20931	0.118157
1	2019	0.233651	2.8255	0.47	192398	0.660209	1.12646	0.109176
1	2020	0.20308	2.74732	0.4	131878	0.471786	1.0272	0.0943604
2	2011	0.27272	3.738	1.622	75480.4	0.710919	1.34897	0.17747
2	2012	0.327899	2.67148	2.617	84954.8	0.640205	1.21337	0.219901
2	2013	0.224808	1.50813	2.1	101524	0.207155	1.00749	0.19761
2	2014	0.150205	1.88941	1.537	108431	0.134105	0.96306	0.160262
2	2015	0.144559	2.1267	1.627	110832	0.839783	1.20431	0.134314
2	2016	0.146388	2.32972	1.787	125925	0.854534	1.34636	0.126236
2	2017	0.184474	4.50429	2.548	137161	0.611608	1.18441	0.136022
2	2018	0.215583	2.50358	3.474	183485	0.594817	1.14992	0.169296
2	2019	0.239543	5.0458	4.483	213817	0.769515	1.25925	0.162144
2	2020	0.238306	9.97317	5.141	221809	0.567965	1.09327	0.21037
3	2011	0.301776	1.36195	1.52	31445.3	0.269852	1.06082	0.0372125
3	2012	0.163392	1.1806	0.98	41282.4	0.222942	1.05228	0.0233434
3	2013	0.159437	1.17026	1.09	51379.7	0.129234	1.04992	0.0185657
3	2014	0.135218	1.18096	1.09	58118.3	0.130494	1.05776	0.0204907
3	2015	0.128611	1.19701	1.06	61056	0.316146	1.05543	0.017206
3	2016	0.126092	1.17757	0.59	58006.5	0.355348	1.05206	0.0153539
3	2017	0.113248	1.12045	0.54	64927.4	0.204206	1.02722	0.0142138
3	2018	0.101616	1.06934	0.4	70095.5	0.180744	1.04033	0.0130991
3	2019	0.206068	1.7979	1.22	71049.2	0.169374	1.04162	0.0102829
3	2020	0.139196	1.43446	1.17	73926.2	0.177271	1.03461	0.00732095
4	2011	0.077468	1.66343	0.2754	51005.1	0.0228474	1.06443	0.034993
4	2012	0.04386	1.31283	0.1525	75939.3	0.117743	1.1766	0.0383455
4	2013	0.043578	1.64155	0.1699	77619.3	0.343348	1.17646	0.0419856
4	2014	0.069385	2.53928	0.3456	73937.9	0.210327	1.07417	0.0331146
4	2015	0.096485	3.2974	0.23	72136.6	0.313366	1.13751	0.0325717
4	2016	0.115228	1.99103	0.3469	92685.9	0.141395	0.890611	0.0226374
4	2017	0.024346	1.27568	0.0677	93025	0.288176	1.14114	0.0222978
4	2018	-0.224527	1.04384	-0.74	119534	0.0647902	1.10378	0.0153312
4	2019	0.035516	1.14869	0.06	111699	0.0432588	1.14753	0.0154793
4	2020	-0.047396	1.15539	-0.16	91931.5	-0.015932	1.0746	0.0141014
5	2011	0.011478	1.59374	0.055	38233.9	0.00253791	1.10248	0.0278111
5	2012	0.002142	2.06779	0.0371	47760.3	0.167752	1.11976	0.0396183
5	2013	-0.159008	2.57859	-0.256	54332.8	-0.0208424	1.09479	0.0357857
5	2014	0.024503	2.46121	0.0602	57025.5	0.0394996	1.036	0.0419253
5	2015	0.040465	1.4106	0.0807	59451.5	0.360595	0.886654	0.0396263
5	2016	0.024202	1.52774	0.0704	92828.2	0.191848	1.03629	0.0365787
5	2017	0.015678	1.35264	0.051	101662	-0.0124168	1.04351	0.0343503
5	2018	0.033833	1.09906	0.12	119779	0.297564	1.05894	0.0445885
5	2019	0.026515	1.09393	0.09	139452	0.126802	1.01472	0.0232505
5	2020	0.002562	1.10882	0.015	139067	0.136412	1.08306	0.0271129
6	2011	0.049554	1.50134	0.1218	50871.8	0.153382	1.01821	0.0170835
6	2012	0.057198	1.68421	0.1396	60648.6	0.172482	1.01384	0.0176211
6	2013	0.155643	1.79211	0.4125	60981.6	0.344455	1.01808	0.0189482
6	2014	0.143823	1.70786	0.403	71062.9	0.191774	1.01204	0.0209387
6	2015	0.137114	2.24757	0.4053	79452.7	0.377497	1.02133	0.015657
6	2016	0.115685	1.25433	0.3218	79023	0.306984	0.937199	0.0183106
6	2017	0.16007	1.93444	0.5183	85232.3	0.313648	0.774581	0.0224122
6	2018	0.140418	1.3063	0.52	86895.5	0.165235	0.772472	0.0236222
6	2019	0.16103	1.70247	0.6786	103742	0.13212	0.740109	0.0159535
6	2020	0.149691	3.09766	0.8581	106887	0.135159	0.847104	0.00514981
7	2011	0.420921	6.02213	8.44	168084	1.07044	1.28566	0.273979
7	2012	0.46037	5.03452	12.82	215347	1.2514	1.09287	0.254592
7	2013	0.401213	2.60768	14.58	186643	1.11919	1.07085	0.249538
7	2014	0.327218	3.44765	13.44	194065	1.19809	1.03815	0.238964
7	2015	0.270762	3.40848	12.34	214865	0.869568	1.11118	0.184039
7	2016	0.252308	4.04477	13.31	220095	1.01164	1.5241	0.175777
7	2017	0.337445	6.79574	21.56	228458	0.574286	1.05735	0.186355
7	2018	0.354495	4.90224	28.02	250419	0.975189	1.09157	0.217568
7	2019	0.339164	8.34369	32.8	284016	1.10019	1.06894	0.232386
7	2020	0.319921	11.9757	37.17	281141	1.13127	1.09216	0.209983
8	2011	0.09805	1.88281	0.23	219070	0.0234244	1.10717	0.0913713
8	2012	0.092262	1.6937	0.28	177317	0.313611	1.14075	0.106241
8	2013	0.100442	2.91232	0.33	314869	0.21945	1.18135	0.102807
8	2014	0.114064	2.25773	0.46	325986	0.0517966	1.14408	0.081287
8	2015	0.094738	1.92283	0.34	346420	0.263987	1.17335	0.0841076
8	2016	0.118227	1.61326	0.46	377532	0.35976	1.18305	0.0631749
8	2017	0.127408	1.71749	0.5	407299	0.177107	1.09487	0.0632164
8	2018	0.077698	1.19245	0.28	209653	0.148628	1.15785	0.0450577
8	2019	0.096108	1.46043	0.41	238262	0.292769	1.10482	0.03351
8	2020	0.096146	1.54127	0.5	254209	0.239663	1.18675	0.0286409
9	2011	0.171228	1.80846	1.286	64591.5	0.261639	1.09291	0.244078
9	2012	0.153344	1.69405	1.302	72739.4	0.423063	1.08673	0.246619
9	2013	0.148174	1.98369	1.461	79887.6	0.306031	1.10574	0.217022
9	2014	0.13851	1.78509	1.473	86675.2	0.183202	1.08298	0.199804
9	2015	0.102504	1.51848	1.268	93603.9	0.263977	1.09179	0.176957
9	2016	0.06692	1.39209	0.772	99243.4	0.288863	1.12145	0.178853
9	2017	0.079775	1.58804	0.935	106018	0.212733	1.12719	0.172156
9	2018	0.085618	1.4294	1.053	117409	0.330276	1.19963	0.153309
9	2019	0.099946	1.67629	1.371	126550	0.30078	1.18098	0.145464
9	2020	0.112737	2.4037	1.629	125319	0.319371	1.16173	0.125001
10	2011	0.338791	2.31305	1.13	126915	0.285282	1.18834	0.124036
10	2012	0.251043	2.38367	1.07	62707.5	0.209842	1.14847	0.133632
10	2013	0.268582	2.50207	1.65	67166.5	0.352823	1.17342	0.0950563
10	2014	0.237178	2.71265	1.35	84134	0.129901	1.12135	0.0757069
10	2015	0.238888	2.96857	0.76	109307	0.523925	1.14184	0.092372
10	2016	0.261355	3.11582	0.93	109152	0.859793	1.11559	0.0993759
10	2017	0.247663	4.43125	0.99	111510	0.293765	1.11227	0.104497
10	2018	0.242206	3.31509	1.06	128536	0.449892	1.12214	0.0963243
10	2019	0.255958	3.60156	1.15	154255	0.269006	1.12457	0.0816401
10	2020	0.249933	4.27959	1.17	157885	0.283352	1.09432	0.061384
11	2011	0.093379	0.97886	0.675	45150.6	0.151729	1.19242	0.163828
11	2012	0.06177	0.780708	0.246	48100.7	0.192334	1.18867	0.154988
11	2013	0.065191	1.20328	0.253	50935.6	0.526085	1.218	0.154786
11	2014	0.060156	1.18586	0.259	62017.9	0.221279	1.16716	0.145092
11	2015	0.046353	1.27155	0.209	66907.6	0.358082	1.16885	0.136403
11	2016	0.023296	1.07306	0.111	70094.3	0.273523	1.15699	0.134159
11	2017	0.012612	1.04968	0.057	71103.4	0.315069	1.17832	0.124889
11	2018	0.016336	0.898682	0.064	82722.2	0.277449	1.14739	0.115258
11	2019	0.019115	1.01186	0.082	86571.7	0.36762	1.17066	0.1156
11	2020	0.020572	1.29862	0.07	83600.5	0.345051	1.15898	0.103202
12	2011	0.143878	5.40715	0.93	88154.6	0.29079	1.16196	0.135481
12	2012	0.270563	3.8159	2.62	43134.1	1.17255	1.12936	0.210838
12	2013	0.295315	5.24676	1.75	43683.9	0.82679	1.09152	0.173748
12	2014	0.268807	3.15835	1.8358	51954.2	0.846058	1.08975	0.149217
12	2015	0.25943	2.94395	1.2892	66543.5	1.12639	1.09174	0.154409
12	2016	0.278522	3.23436	1.3346	63394.9	0.897929	1.08087	0.184196
12	2017	0.295423	3.787	1.3091	61320.3	0.762794	1.07969	0.186504
12	2018	0.344554	3.48295	1.4894	67004.2	0.638903	1.08643	0.180209
12	2019	0.367676	3.36526	1.6382	86403	0.39204	1.08873	0.174896
12	2020	0.308853	4.68625	1.8642	83664.3	0.882638	1.07694	0.208351
13	2011	0.102394	2.29714	0.72	58924.1	0.0927861	1.07126	0.089743
13	2012	0.082132	1.48198	0.7	54574.3	0.233007	1.06359	0.0845708
13	2013	0.067174	2.43835	0.29	65458.8	0.0943486	1.04235	0.0821911
13	2014	0.044196	2.20617	0.2	84046.9	0.0933914	1.03568	0.0878605
13	2015	0.018633	2.38457	0.04	113324	0.0299324	1.02702	0.083863
13	2016	0.02077	2.39377	0.05	102078	0.166568	1.14766	0.0749964
13	2017	0.036797	1.50889	0.09	98645.7	0.162715	1.08905	0.0906209
13	2018	0.049924	1.27869	0.13	143401	0.209046	1.09489	0.0855291
13	2019	0.102143	2.16334	0.27	157448	0.136359	1.11529	0.0582496
13	2020	0.294041	3.45896	0.96	160930	0.466063	1.11594	0.0716473
14	2011	0.478337	6.1469	4.47	79834.3	0.640207	1.4	0.292771
14	2012	0.499766	4.26244	5.7	70636.2	0.633387	1.13014	0.259378
14	2013	0.31159	1.5623	4.63	86100	0.301213	1.15852	0.207874
14	2014	0.242852	2.95889	4.19	86607.3	0.310938	1.1341	0.179311
14	2015	0.251471	3.05044	3.56	93337.4	0.551763	1.21425	0.169242
14	2016	0.23704	2.74181	3.87	101283	0.595389	1.33093	0.158492
14	2017	0.238378	4.00627	4.4	101971	0.51219	1.19046	0.159284
14	2018	0.257142	2.87996	5.385	116865	0.579513	1.16331	0.183702
14	2019	0.210682	3.11518	4.8991	142311	0.411077	1.21756	0.187207
14	2020	0.199693	6.60217	4.9843	136108	0.271457	1.02021	0.133998
15	2011	0.033738	1.66418	0.184	45689	0.342843	1.11808	0.0263663
15	2012	0.033142	1.53779	0.1937	44518.7	0.521034	1.14911	0.0416789
15	2013	0.030205	1.71506	0.084	50545.6	0.424194	1.15852	0.0386142
15	2014	0.026732	2.0998	0.07	51400.4	0.136031	1.15398	0.0436656
15	2015	0.016992	4.496	0.045	59754.8	0.341282	1.15135	0.0387087
15	2016	0.0063	3.45891	0.018	55787.3	0.191603	1.21964	0.0350507
15	2017	0.004394	2.65449	0.015	53765.3	0.258164	1.16576	0.0337497
15	2018	0.005971	1.20869	0.016	69003.9	0.0495473	1.11627	0.029072
15	2019	0.006191	2.02339	0.016	79933.5	0.136494	1.11711	0.0223111
15	2020	0.02169	1.67322	0.058	75008.5	0.125541	1.07992	0.0170497
16	2011	0.075437	0.908041	0.09	142669	-0.0728426	1.14739	0.0997378
16	2012	0.048408	1.42753	0.05	179499	-0.0210366	0.996693	0.0737
16	2013	0.027346	1.13736	0.05	181537	0.0602616	1.0375	0.087266
16	2014	0.054318	1.13387	0.12	189709	0.0358492	1.1625	0.0732723
16	2015	-0.005429	1.49277	0.06	180120	-0.00660928	1.12827	0.0625686
16	2016	-0.007305	1.32992	0.04	186582	0.0200597	1.02661	0.0440942
16	2017	0.016035	0.887132	0.0547	185880	0.0396907	1.06193	0.0435596
16	2018	0.010857	0.564461	0.0388	200103	0.0267437	1.06792	0.0418404
16	2019	0.016667	0.570015	0.044	193066	-0.00256363	1.04931	0.0548757
16	2020	0.155661	1.17204	0.27	95843.7	0.25753	1.11639	0.0328324
17	2011	0.009144	0.656684	0.0322	59968.3	0.0798725	1.05245	0.01889
17	2012	-0.307511	0.568131	-0.7325	72384.2	0.0966383	1.26831	0.00509833
17	2013	0.013762	0.933368	0.0472	107679	0.155542	0.996704	0.0243446
17	2014	0.0044	1.2691	0.0158	118858	-0.267357	1.02154	0.017822
17	2015	0.011466	2.01745	0.0371	114950	0.0839142	1.15269	0.0177773
17	2016	0.080089	1.34696	0.251	114749	-0.13298	1.1665	0.020911
17	2017	0.10703	0.953806	0.3607	136066	0.62551	1.15404	0.048701
17	2018	0.07497	0.970865	0.2455	137867	0.314333	1.09399	0.0297644
17	2019	0.07766	1.12218	0.2738	154907	0.138747	1.13059	0.0319898
17	2020	0.064225	1.1813	0.2474	149990	0.145361	1.14388	0.026815

## Sheet: tobit
firm	year	CSR	Size	CG	Equity	Profit	Age
1	2011	1.79225	21.1271	1	0.425523	0.0877192	2.70805
1	2012	1.9632	21.1598	1	0.425523	0.170227	2.77259
1	2013	1.96861	21.3521	1	0.425523	0.508951	2.83321
1	2014	2.43476	21.3389	1	0.406841	0.310267	2.89037
1	2015	1.57058	21.6361	1	0.406841	0.0410675	2.94444
1	2016	1.62705	21.8535	1	0.406841	-0.0274411	2.99573
1	2017	1.67233	21.757	1	0.406841	-0.0824813	3.04452
1	2018	1.72982	21.7681	0	0.406841	-0.0131284	3.09104
1	2019	1.64977	21.8564	0	0.406841	0.128937	3.13549
1	2020	1.39587	21.8524	0	0.406841	-0.069478	3.17805
2	2011	0.819516	24.3316	1	0.560693	0.401643	2.63906
2	2012	0.8369	24.5354	1	0.36	0.616378	2.70805
2	2013	1.01391	24.5104	1	0.36	-0.194811	2.77259
2	2014	0.738668	24.5608	1	0.36	-0.272043	2.83321
2	2015	0.507713	24.685	1	0.36	0.0581474	2.89037
2	2016	0.574698	24.8532	1	0.36	0.100816	2.94444
2	2017	0.918154	24.9849	1	0.36	0.429262	2.99573
2	2018	0.690771	25.1787	1	0.352057	0.391899	3.04452
2	2019	1.11417	25.3904	1	0.352057	0.298434	3.09104
2	2020	1.43692	25.4585	1	0.344328	0.147303	3.13549
3	2011	3.24638	23.8001	1	0.232447	0.805692	2.63906
3	2012	2.74542	23.93	1	0.232447	-0.34398	2.70805
3	2013	2.12791	24.1088	1	0.232447	0.135582	2.77259
3	2014	1.17382	24.2319	1	0.294129	0.0489505	2.83321
3	2015	1.16347	24.2848	1	0.294129	0.13249	2.89037
3	2016	1.44038	24.3445	1	0.294129	0.0583768	2.94444
3	2017	1.11557	24.4716	1	0.290796	-0.063921	2.99573
3	2018	1.46551	24.5933	1	0.290796	-0.071757	3.04452
3	2019	1.98538	24.8855	1	0.292107	1.27076	3.09104
3	2020	1.294	25.4187	1	0.294944	-0.053859	3.13549
4	2011	1.42238	20.816	1	0.425047	0.148807	0.693147
4	2012	0.835285	20.9828	1	0.425047	-0.379089	1.09861
4	2013	0.766193	20.9591	1	0.425047	0.00928117	1.38629
4	2014	1.15864	21.5467	0	0.404877	1.2751	1.60944
4	2015	1.17921	22.217	0	0.361758	1.39577	1.79176
4	2016	1.40207	22.3724	0	0.314005	0.519651	1.94591
4	2017	0.922425	22.4487	0	0.314005	-0.782707	2.07944
4	2018	2.01867	22.2877	0	0.314005	-9.4094	2.19722
4	2019	1.66979	22.3218	1	0.314005	-1.14376	2.30259
4	2020	5.10578	22.5248	1	0.314005	-2.31764	2.3979
5	2011	3.31673	21.9636	1	0.413322	-0.498186	2.70805
5	2012	1.4107	22.0168	1	0.413322	-0.803658	2.77259
5	2013	6.78711	21.9808	1	0.369255	-73.1145	2.83321
5	2014	1.49809	22.1536	1	0.369255	-1.14346	2.89037
5	2015	1.02303	22.7496	1	0.357855	2.69214	2.94444
5	2016	0.689179	22.7538	1	0.357855	-0.124406	2.99573
5	2017	6.87386	22.7552	1	0.357855	-0.411233	3.04452
5	2018	0.668328	23.3241	1	0.357855	1.36515	3.09104
5	2019	0.697219	23.3176	1	0.357855	-0.146053	3.13549
5	2020	0.681447	23.3165	1	0.357855	-0.903168	3.17805
6	2011	1.639	22.0999	1	0.550567	-0.509791	2.07944
6	2012	2.06997	22.2365	1	0.550567	0.192871	2.19722
6	2013	2.12294	22.3978	1	0.621845	2.50382	2.30259
6	2014	2.03342	22.5445	1	0.573504	0.145973	2.3979
6	2015	1.93763	22.5299	1	0.573504	0.012773	2.48491
6	2016	1.17123	23.7866	1	0.524524	1.99625	2.56495
6	2017	1.57232	23.9638	1	0.524524	0.994662	2.63906
6	2018	1.52815	24.3735	1	0.514743	-0.00508993	2.70805
6	2019	1.27113	24.5696	1	0.514713	0.320684	2.77259
6	2020	3.06988	24.8861	1	0.443941	0.384889	2.83321
7	2011	1.05751	24.2758	1	0.617584	0.732348	2.3979
7	2012	1.22142	24.5299	1	0.618092	0.514374	2.48491
7	2013	1.20953	24.7388	1	0.619944	0.139662	2.56495
7	2014	0.873544	24.911	1	0.619944	0.0190713	2.63906
7	2015	0.989929	25.1811	1	0.619944	0.0114095	2.70805
7	2016	0.83084	25.4501	1	0.619944	0.0896777	2.77259
7	2017	1.61326	25.6256	1	0.619944	0.617701	2.83321
7	2018	1.40087	25.7975	0	0.619944	0.304181	2.89037
7	2019	1.94799	25.933	1	0.57995	0.162317	2.94444
7	2020	1.29081	26.0864	1	0.539956	0.126298	2.99573
8	2011	1.09126	22.7212	1	0.350268	0.188854	2.30259
8	2012	0.588857	22.9575	1	0.29999	0.237129	2.3979
8	2013	0.776837	23.1715	1	0.299306	0.416931	2.48491
8	2014	0.759172	23.2792	1	0.297812	0.228755	2.56495
8	2015	0.823991	23.4607	1	0.5435	-0.149141	2.63906
8	2016	0.662514	23.5008	1	0.5435	0.361141	2.70805
8	2017	0.859933	23.529	1	0.51623	0.211544	2.77259
8	2018	0.917001	23.61	1	0.51623	-0.356328	2.83321
8	2019	0.763538	23.5933	1	0.51623	0.295974	2.89037
8	2020	0.646385	23.7344	1	0.51623	0.150471	2.94444
9	2011	0.68402	23.7975	0	0.304519	0.134557	2.94444
9	2012	0.518024	23.8871	1	0.304519	0.0262279	2.99573
9	2013	0.490869	24.0325	1	0.304519	0.0705574	3.04452
9	2014	0.580542	24.0192	1	0.305753	0.0225873	3.09104
9	2015	0.837132	24.0732	1	0.308256	-0.201774	3.13549
9	2016	0.492012	24.127	1	0.308256	-0.314101	3.17805
9	2017	0.444244	24.1564	1	0.308256	0.25012	3.21888
9	2018	0.519201	24.2518	1	0.454347	0.129322	3.2581
9	2019	0.487855	24.3426	1	0.454373	0.235812	3.29584
9	2020	0.547619	24.4493	1	0.450019	0.206236	3.3322
10	2011	1.23983	23.7155	1	0.101832	1.30274	2.77259
10	2012	1.54802	23.7097	1	0.101832	-0.0526161	2.83321
10	2013	1.04177	24.2161	1	0.093091	0.843984	2.89037
10	2014	1.53956	24.3994	1	0.093091	0.301556	2.94444
10	2015	1.30097	24.4029	1	0.0879387	0.117096	2.99573
10	2016	1.26139	24.3935	1	0.0990076	0.217988	3.04452
10	2017	1.26023	24.6212	1	0.092738	0.0588777	3.09104
10	2018	1.25977	24.5862	1	0.148983	0.0748284	3.13549
10	2019	1.26487	24.8253	1	0.120915	0.0772986	3.17805
10	2020	1.09394	24.9881	1	0.135355	0.0213233	3.21888
11	2011	0.568567	23.5374	0	0.564764	0.0565413	2.70805
11	2012	0.497053	23.626	1	0.574833	-0.287378	2.77259
11	2013	0.58545	23.6627	1	0.574618	0.195096	2.83321
11	2014	0.539125	23.664	1	0.575719	0.013281	2.89037
11	2015	0.460524	23.627	1	0.573903	-0.207411	2.94444
11	2016	0.405277	23.6277	1	0.57396	-0.491828	2.99573
11	2017	0.483367	23.6191	0	0.57396	-0.458949	3.04452
11	2018	0.61068	23.5962	0	0.57396	0.298718	3.09104
11	2019	0.521652	23.6226	0	0.57396	0.176064	3.13549
11	2020	0.710975	23.6406	1	0.57396	0.0811469	3.17805
12	2011	1.63872	22.7824	0	0.30267	-0.547354	2.63906
12	2012	1.52716	23.5384	1	0.602439	3.7695	2.70805
12	2013	1.89243	23.7062	1	0.602439	0.325878	2.77259
12	2014	1.28359	23.8135	1	0.602439	0.0359769	2.83321
12	2015	1.27195	23.8537	1	0.602439	0.047683	2.89037
12	2016	1.83488	23.7844	1	0.592678	0.0328494	2.94444
12	2017	2.12847	23.8626	1	0.592678	-0.0111824	2.99573
12	2018	2.5697	23.83	1	0.592678	0.125456	3.04452
12	2019	1.66313	24.0778	1	0.734113	0.116142	3.09104
12	2020	2.07941	24.2701	1	0.703309	0.124217	3.13549
13	2011	0.958576	21.7437	1	0.136878	0.0938225	1.38629
13	2012	0.616315	21.8625	1	0.136893	0.0150879	1.60944
13	2013	1.17925	22.034	1	0.126946	-0.134469	1.79176
13	2014	0.761154	21.9868	1	0.122399	-0.315623	1.94591
13	2015	2.67196	22.0691	1	0.104796	-0.568326	2.07944
13	2016	0.936996	22.1469	1	0.10345	0.130763	2.19722
13	2017	0.85244	22.1963	1	0.103708	0.82694	2.30259
13	2018	0.793913	22.2514	1	0.104091	0.407621	2.3979
13	2019	1.22378	22.3878	1	0.105446	1.15925	2.48491
13	2020	1.21513	22.5144	1	0.0997257	2.50301	2.56495
14	2011	1.46635	23.6615	1	0.340504	0.79955	1.09861
14	2012	1.71703	23.887	0	0.340515	0.487186	1.38629
14	2013	1.03442	24.0632	1	0.340515	-0.186894	1.60944
14	2014	0.863777	24.0822	1	0.341648	-0.0987793	1.79176
14	2015	1.14298	24.2455	1	0.341648	0.190139	1.94591
14	2016	0.981552	24.3818	1	0.341648	0.0819596	2.07944
14	2017	0.87683	24.4905	1	0.341648	0.140201	2.19722
14	2018	0.814315	24.6265	1	0.341648	0.226105	2.30259
14	2019	0.753899	24.7021	1	0.341648	-0.0898594	2.3979
14	2020	1.27583	24.7098	1	0.341648	0.013338	2.48491
15	2011	0.991853	21.1501	1	0.516813	-0.0991216	0.693147
15	2012	0.806994	21.1661	1	0.516813	0.00500629	1.09861
15	2013	1.12284	21.1921	1	0.516813	-0.0862202	1.38629
15	2014	0.928111	21.2136	1	0.516813	-0.119772	1.60944
15	2015	3.10394	21.2705	1	0.516813	-0.381721	1.79176
15	2016	4.0138	21.3019	1	0.516813	-0.627233	1.94591
15	2017	6.67234	21.2349	1	0.516813	-0.297268	2.07944
15	2018	2.41706	21.3078	1	0.516813	0.366658	2.19722
15	2019	6.60555	21.3757	1	0.429231	0.0365979	2.30259
15	2020	1.36581	21.423	1	0.308813	2.53638	2.3979
16	2011	2.24491	22.6818	1	0.320452	0.0819819	2.48491
16	2012	7.65294	22.8114	1	0.318718	-0.301337	2.56495
16	2013	1.49755	22.673	1	0.318718	-0.412405	2.63906
16	2014	1.06269	22.7409	1	0.318718	0.973562	2.70805
16	2015	4.83511	22.8066	1	0.312886	-1.10049	2.77259
16	2016	1.47076	22.8513	1	0.309528	0.304394	2.83321
16	2017	0.727509	22.8318	1	0.31221	-3.15642	2.89037
16	2018	1.11673	22.8459	1	0.329062	-0.355035	2.94444
16	2019	10.3734	22.8812	1	0.17	0.368466	2.99573
16	2020	1.57972	22.6282	1	0.17	8.83477	3.04452
17	2011	0.840197	22.9428	1	0.595979	-1.45033	2.77259
17	2012	2.0199	22.9506	1	0.595979	-30.1681	2.83321
17	2013	0.905846	23.1843	1	0.55	-1.09067	2.89037
17	2014	2.07618	23.3898	1	0.55	-0.61237	2.94444
17	2015	1.55611	23.4109	1	0.515277	1.58683	2.99573
17	2016	2.73903	23.6667	1	0.515277	6.45653	3.04452
17	2017	0.772794	23.5625	1	0.515277	0.477119	3.09104
17	2018	0.904547	23.4676	1	0.515277	-0.261664	3.13549
17	2019	0.817028	23.5036	1	0.507298	0.0977169	3.17805
17	2020	0.729297	23.587	1	0.507298	-0.0871884	3.21888
